# Supplementary material
Source: PubMed Central journal article supplement (PMC5773055)
Supplement: NIHMS909459-supplement-ESI.pdf [file NIHMS909459-supplement-ESI.pdf]

*Supplemental Information*

**Impact of structurally modifying hyaluronic acid  
on CD44 interaction**

*D. Bhattacharya,<sup>a</sup> D. Svehkarev,<sup>a</sup> J. J. Soucek,<sup>a</sup> T. K. Hill,<sup>a</sup> M. A. Taylor,<sup>b</sup> A. Natarajan<sup>b,c</sup> and*

*A. M. Mohs<sup>a,c,d\*</sup>*

a. Department of Pharmaceutical Sciences, University of Nebraska Medical Center, Omaha, NE 68198-6858, USA.

b. Eppley Institute for Research in Cancer and Allied Diseases, University of Nebraska Medical Center, Omaha, NE 68198-6858, USA.

c. Fred and Pamela Buffett Cancer Center, University of Nebraska Medical Center, Omaha, NE 68198-6858, USA.

d. Biochemistry and Molecular Biology, University of Nebraska Medical Center, Omaha, NE 68198-6858, USA

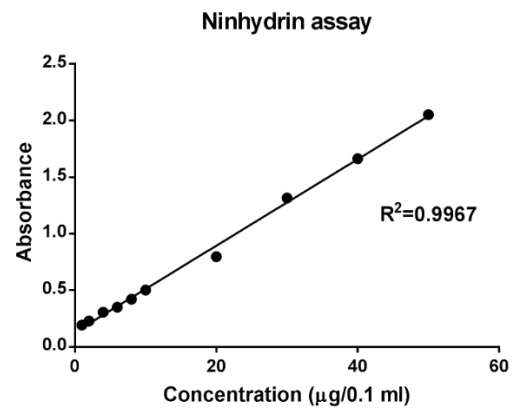

**Figure S1.** Standard curve for determination of degree of deacetylation.

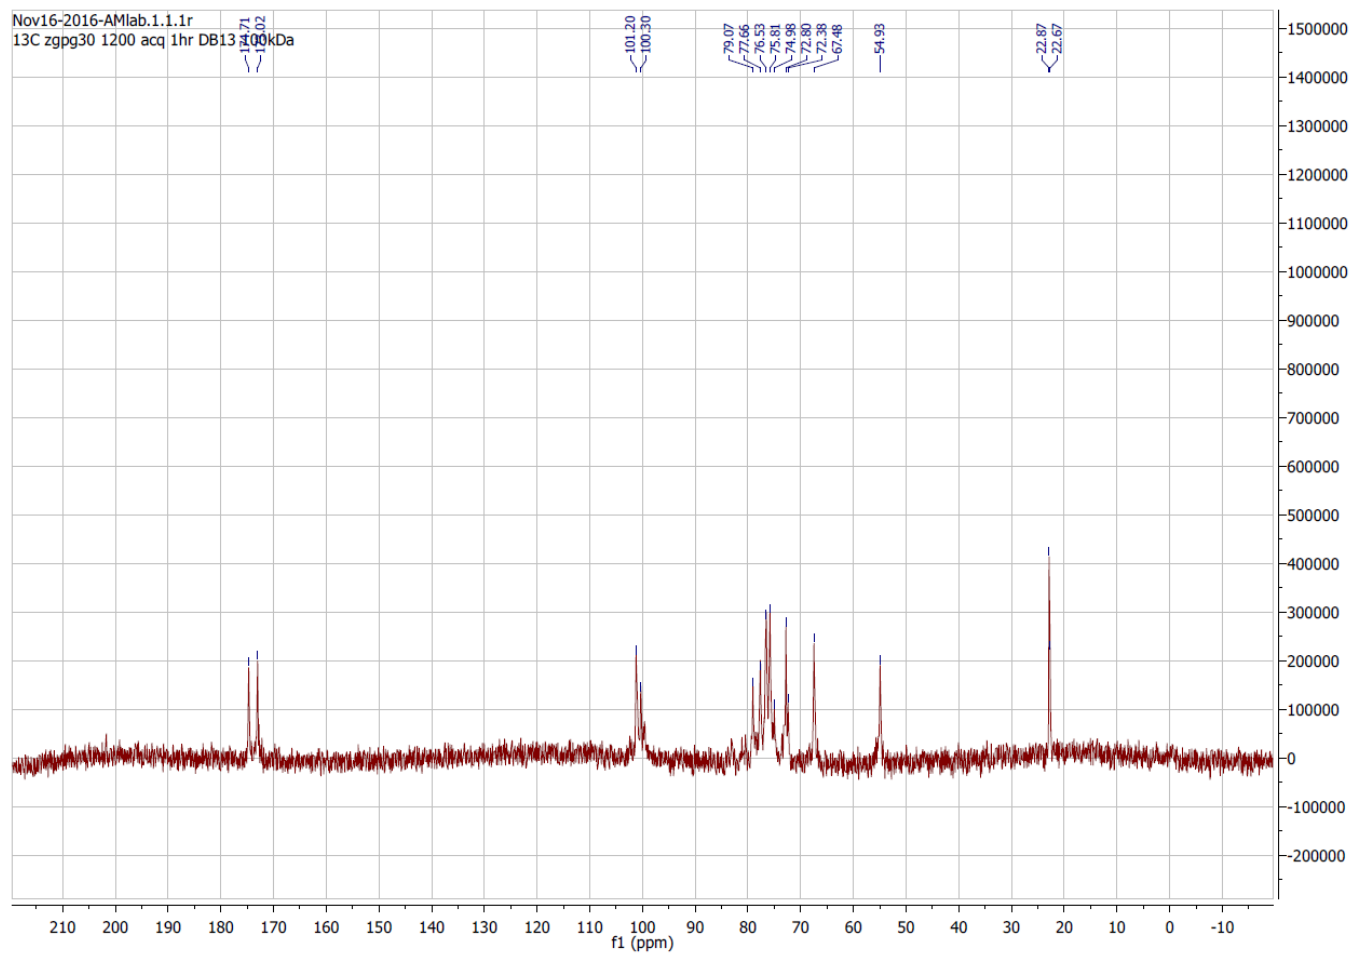

**Figure S2**  $^{13}\text{C}$  NMR spectra of sulfated HA

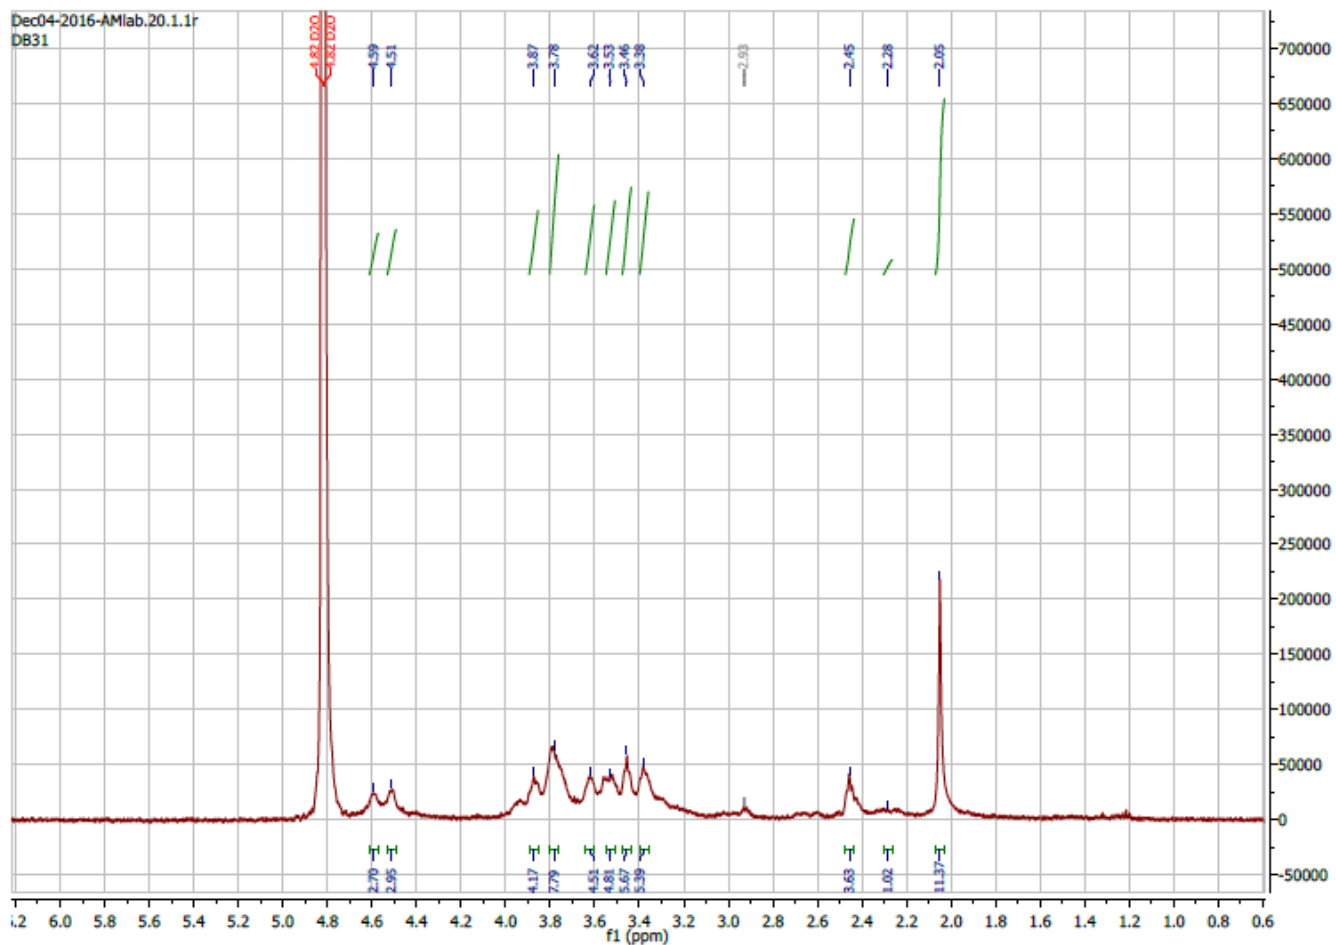

Figure S3.  $^1\text{H}$  NMR sulfated HA

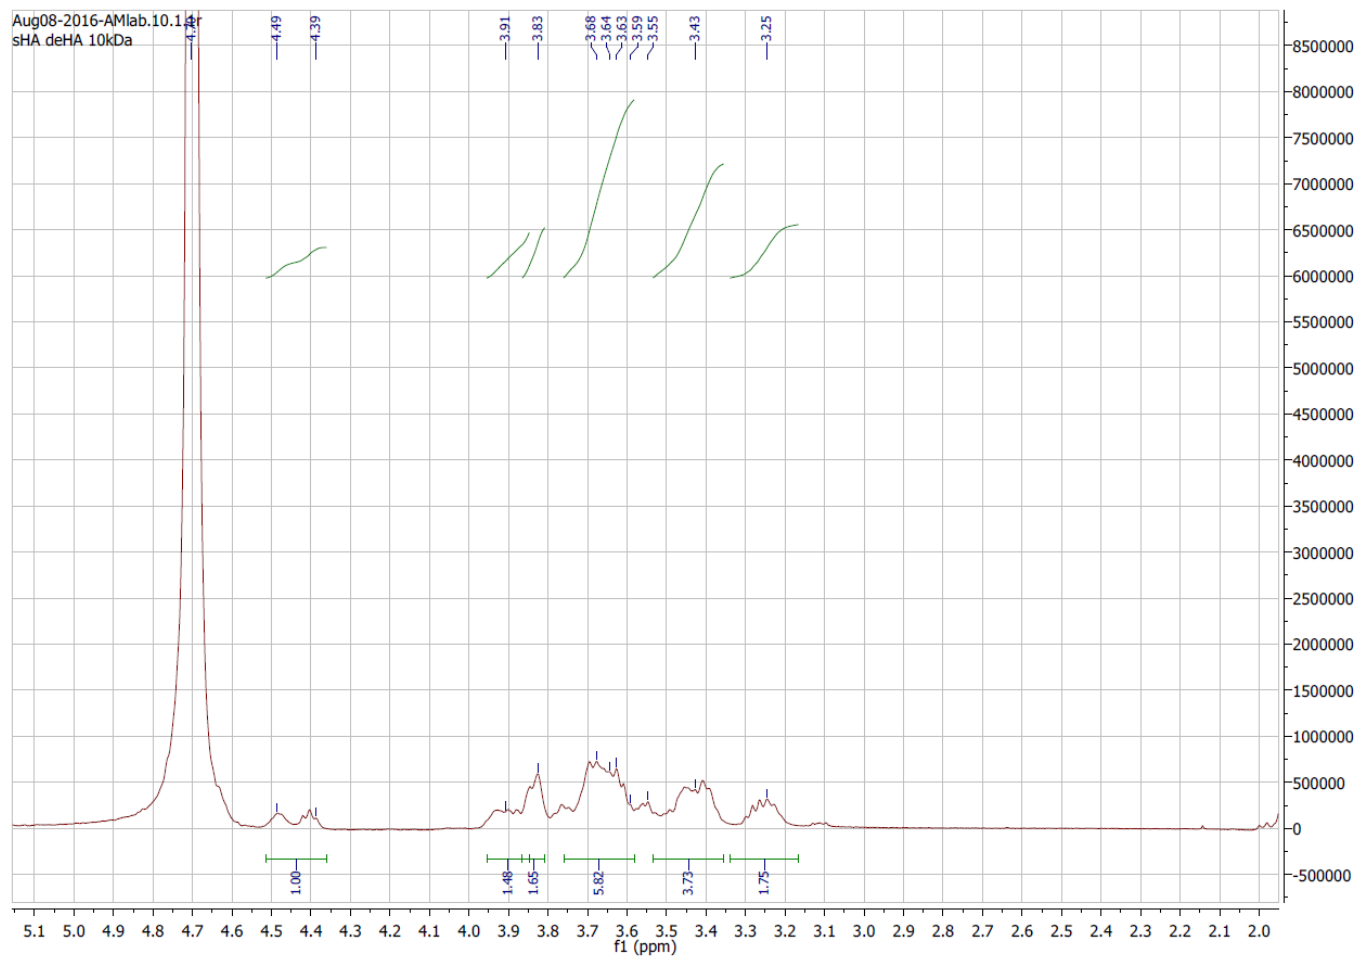

Figure S4. <sup>1</sup>H NMR of s-deHA

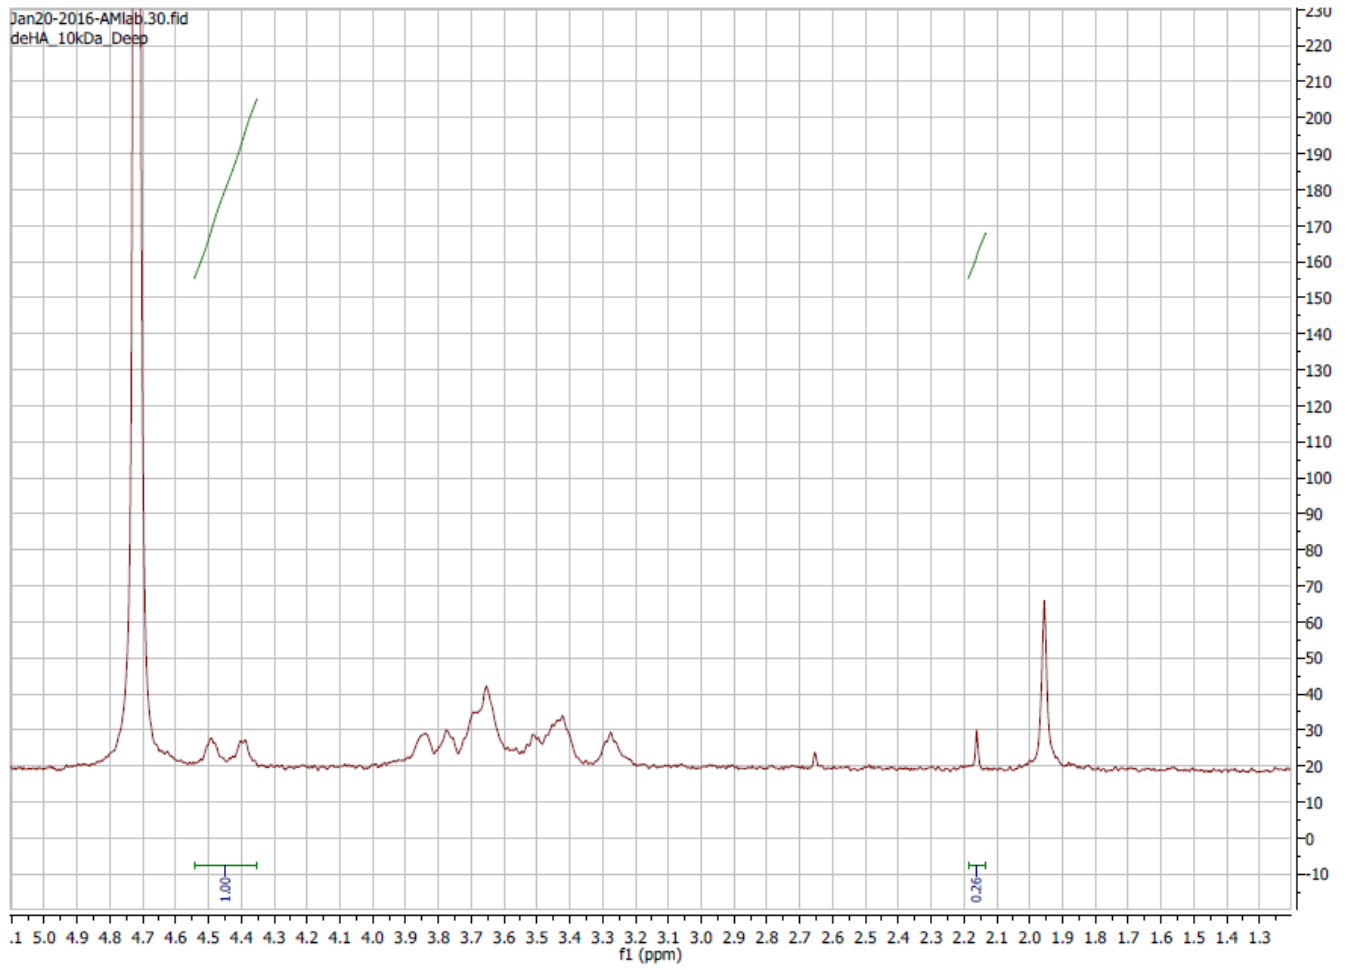

**Figure S5.**  $^1\text{H}$  NMR of deacetylated HA

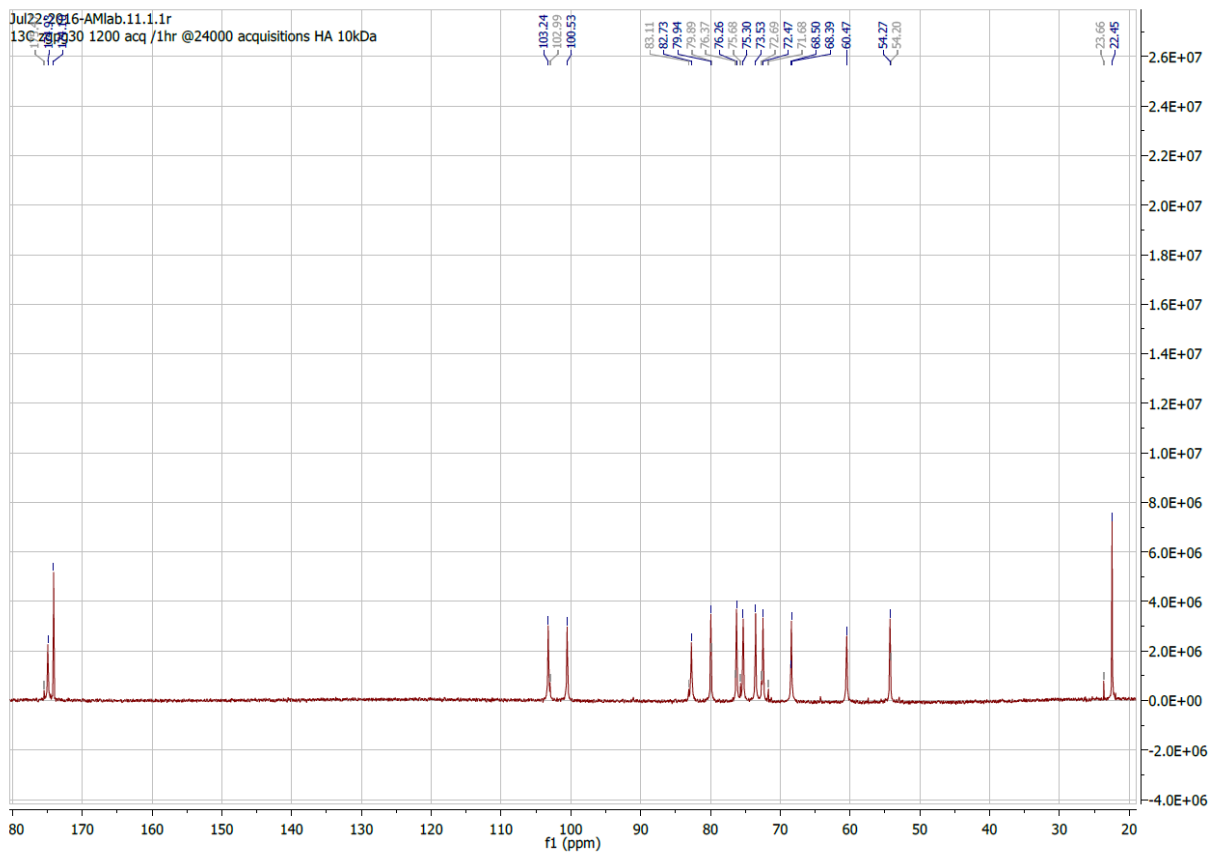

**Figure S6:** <sup>13</sup>C NMR spectra of HA

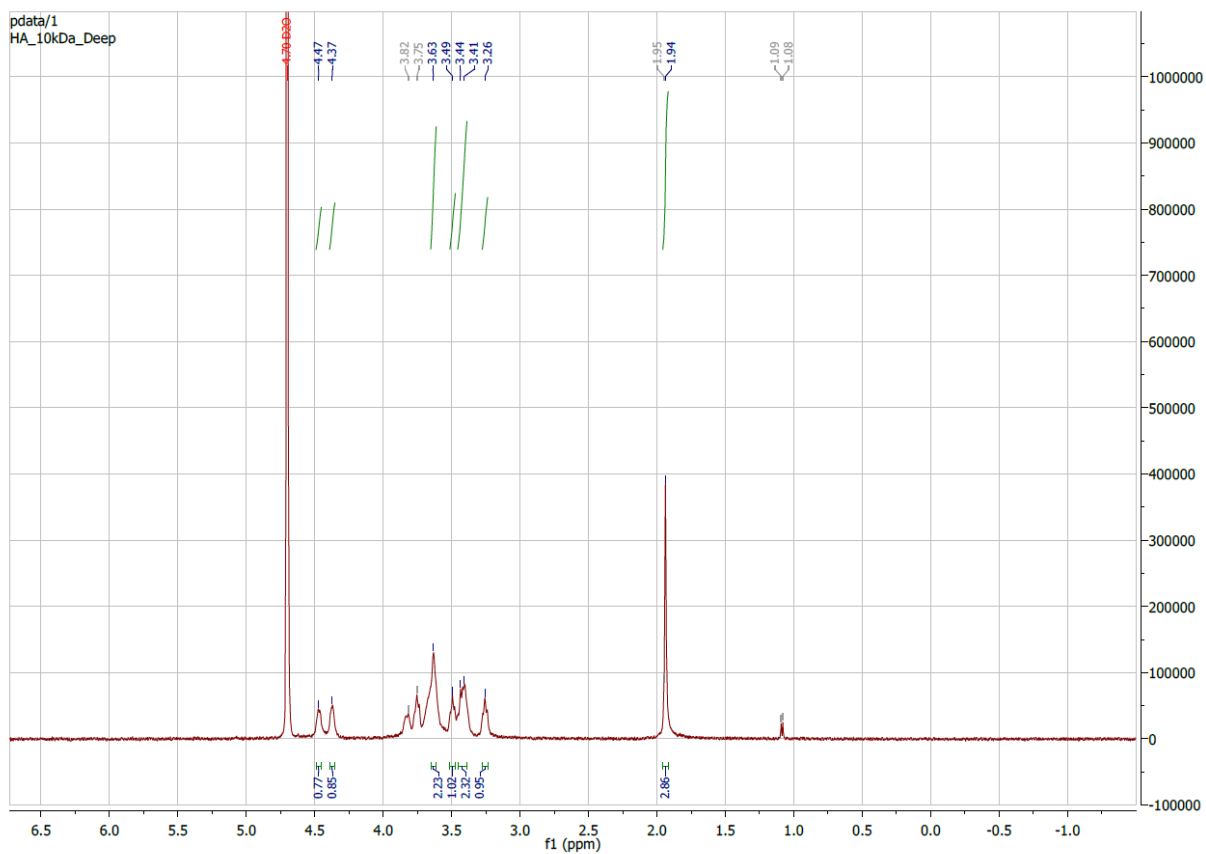

**Figure S7:** <sup>1</sup>H NMR spectra of HA.

|                 | Elemental analysis |       |      | Degree of substitution of sulfate |
|-----------------|--------------------|-------|------|-----------------------------------|
|                 | S                  | C     | H    |                                   |
| <b>Native</b>   | -                  | 25.25 | 4.08 | -                                 |
| <b>Sulfated</b> | 7.23               | 27.45 | 4.9  | 1.3                               |

**Table S1.** Elemental analysis and degree of substitution of native and sulfated HA.
